# Supplementary material
Source: Springer Nature journal article supplement (https://www.springermedizin.de/resource/supplementary/12885_2013_4324_MOESM6_ESM.pdf/9467712)

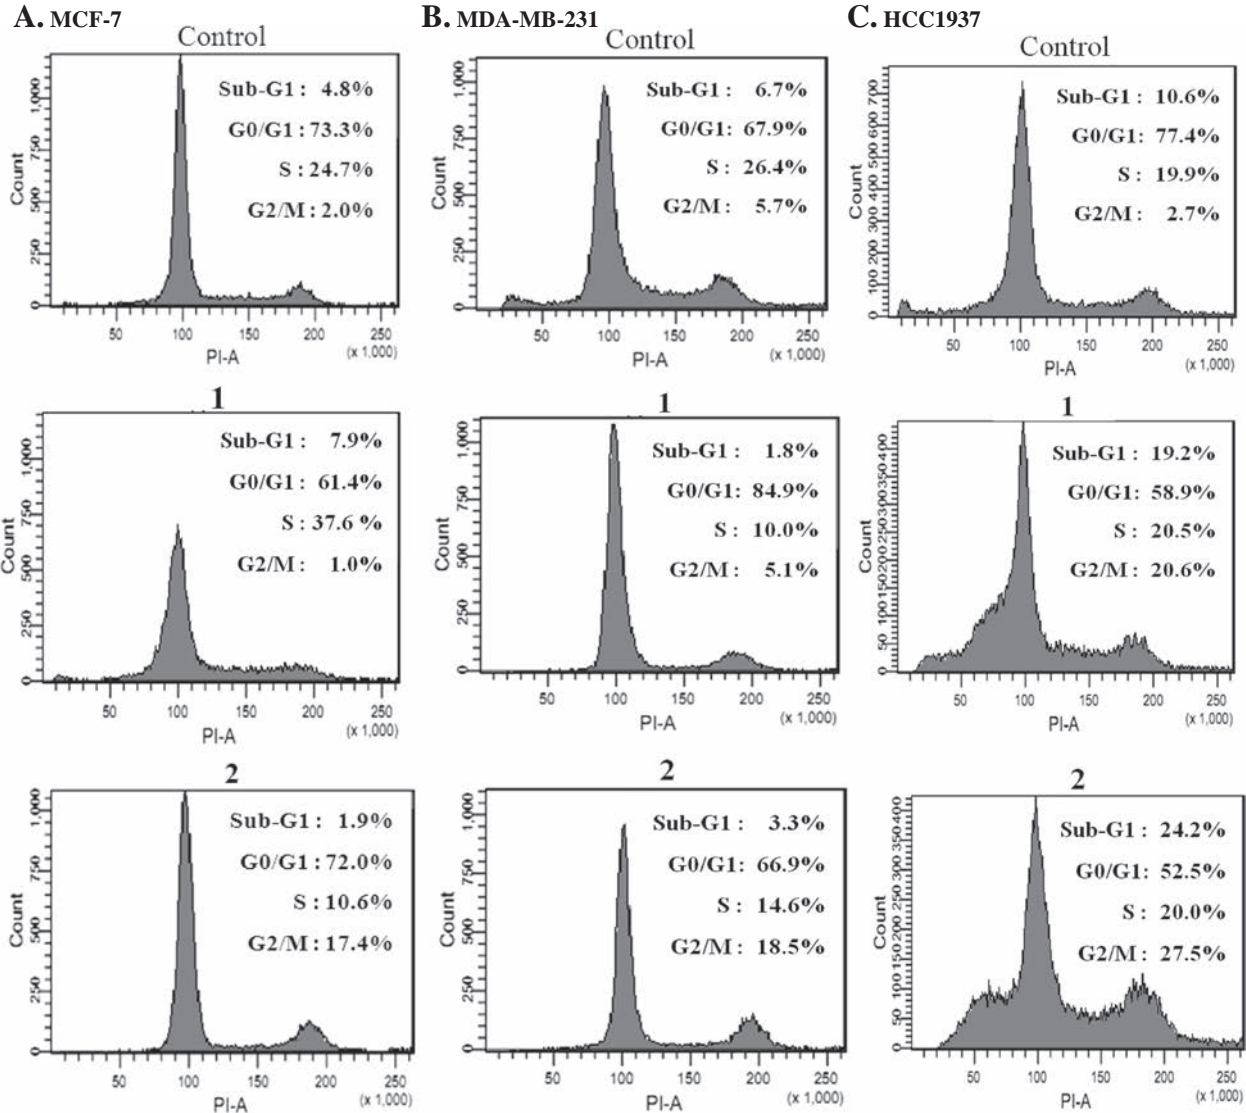

Supplement: MOESM6 [file 9467712]
